# Supplementary material
Source: MDPI journal article supplement (https://www.mdpi.com/2073-4441/14/8/1269)
Supplement: s1 [file s1 › water-1636710-supplementary.pdf]

## Supplementary Materials

### Questionnaire for Fishers

**Name:**

**Age:**

**Educational attainment:**

**How many members of individuals in a household:**

**Address:**

**Phone Number:**

1. Are you a fisher?
2. How many years are you fishing?
3. Are you a member of an association?
4. What fishing gear do you usually bring with you to fish?

What is the capacity of your boat?

5. What species do you usually catch and how many kilograms per fishing trip?

| Species | Kilograms | Price (Taka) |
|---------|-----------|--------------|
|         |           |              |
|         |           |              |
|         |           |              |
|         | Total     | Total        |

6. How many times do you go out to catch a fish in a week?

Do you fish alone or with a crew? If with a crew, how many, including the respondent?

7. How long do you stay on the fishing ground?
8. How many hours does it take to go to your fishing ground from your port of origin?
9. How much do you spend on fuel on one fishing trip?
10. Do you ice for fish preservation? How much do you spend on ice per one trip?
11. How much do you spend on rice/food per trip?
12. In a year, how much do you spend for the maintenance of your fishing gear?
13. In a year, how much do you spend for the maintenance of your boat?
14. In a year, how much do you spend for the registration of your boat?
15. What percentage of your catch is given to your family (for consumption)?
16. What percentage is sold to the local market?
17. What percentage is sold to traders/financiers?

**B. What was your experience during the time of the COVID-19 pandemic?**

18. Were you affected by the pandemic?
19. How did it affect your fishing operation?
20. How did it affect the amount of your fish catch? Are you catching more or less?
21. If so, how much is it less compared to before the pandemic? Or how much is it more compared to before the pandemic?
22. Were your family also affected by the pandemic?
23. How did it affect your family?

Economically?

Emotionally?

Daily Food?

Electric bills?

Water bills?

24. Are there other problems you encountered during this pandemic?

25. What kind of help can the government extend for you?

**C. What was your experience of the closed fishing period?**

26. Were you affected by the closed fishing period?

27. If yes, how did it affect your fishing operation?

28. How did it affect the amount of your fish catch? Are you catching more or less?

29. How many kilos are you catching more or less compared to before the closed fishing period?

30. Were your family also affected by the closed fishing season?

32. How did it affect your family?

Economically?

Emotionally?

Daily Food?

Electric bills?

Water bills?

33. Are there other problems you encountered during this closed fishing season?

34. What kind of help can the government extend for you?

**Questions for Govt. officer and University Teachers**

**Teachers**

1. What's your opinion about the effect of COVID-19 on the socio-economic condition of the marginal fishermen?

2. What's your suggestion to overcome the present socio-economic condition of the fishermen?

**Govt. officers**

1. What was the condition of the fishermen during the Corona period? Did the Department of Fisheries take any specific measures for marginal fishers then?
2. Was any special project taken then for fishers or fish sellers?
3. What do you think about the current situation of fishers?
4. Many people are not getting the required amount of rice assistance given by the Government (during coronation or off-period). What is the reason for this?
5. Apart from rice, what else does the Department of Fisheries do for fishermen?
6. Has your department taken any action to protect Dadan/has any action taken from the Government regarding to provide loans on easy terms to the fishermen?
7. What measures can be taken to develop a sustainable fishing system aiding the small-scale fishers?
